# Supplementary material for: Changes of Acute Kidney Injury Epidemiology during the COVID-19 Pandemic: A Retrospective Cohort Study
Source: MDPI journal article supplement (doi:10.3390/jcm11123349), 2022-06-10
Supplement: s1 [file s1]

# CHANGES OF IN-HOSPITAL ACUTE KIDNEY INJURY EPIDEMIOLOGY AND OUTCOMES

## DURING COVID-19 PANDEMIC: A RETROSPECTIVE COHORT STUDY

### SUPPLEMENTAL MATERIALS

Supplementary Table S1. Main discharge diagnosis of patients hospitalized in pre-COVID-19 (Jan 2016-Dec 2019) and COVID-19 period (Jan-Dec 2020)

|                                          | Pre-COVID-19<br>period | All   | COVID-19<br>period |                   |                             | p-values                               |                                      |
|------------------------------------------|------------------------|-------|--------------------|-------------------|-----------------------------|----------------------------------------|--------------------------------------|
|                                          |                        |       | SARS-CoV-2<br>neg  | SARS-CoV-2<br>pos | COVID19<br>vs<br>PreCOVID19 | SARS-CoV-2 pos<br>vs<br>SARS-Cov-2 neg | SARS-CoV-2 neg<br>vs<br>Pre-COVID-19 |
| <b>N.</b>                                | 51681                  | 10062 | 9026               | 1036              |                             |                                        |                                      |
| <b>Discharge diagnosis, %</b>            |                        |       |                    |                   |                             |                                        |                                      |
| <b>Respiratory diseases <sup>a</sup></b> | 9.93                   | 20.22 | 15.91              | 55.02             | <0.0001                     | <0.0001                                | <0.0001                              |
| <b>Infectious diseases <sup>a</sup></b>  | 1.17                   | 1.11  | 0.8                | 0.39              | <0.0001                     | 0.147                                  | 0.002                                |
| <b>Cardiovascular diseases</b>           | 22.68                  | 21.35 | 22.04              | 12.55             | <0.0001                     | <0.0001                                | 0.176                                |
| <b>Gastrointestinal disease</b>          | 11.31                  | 10.38 | 10.75              | 5.79              | 0.002                       | <0.0001                                | 0.119                                |
| <b>Urogenital diseases</b>               | 5.18                   | 4.57  | 4.69               | 2.90              | 0.004                       | 0.008                                  | 0.048                                |
| <b>CNS Diseases</b>                      | 6.81                   | 6.15  | 6.47               | 2.51              | 0.006                       | <0.0001                                | 0.239                                |
| <b>Mental disease</b>                    | 7.29                   | 5.19  | 5.44               | 2.32              | <0.0001                     | <0.0001                                | <0.0001                              |
| <b>Endocrine disorders</b>               | 2.14                   | 1.43  | 1.48               | 0.77              | <0.0001                     | 0.066                                  | <0.0001                              |
| <b>Hematological disorders</b>           | 1.52                   | 1.24  | 1.21               | 1.35              | 0.024                       | 0.690                                  | 0.023                                |
| <b>Pregnancy complications</b>           | 1.56                   | 1.47  | 1.07               | 0.19              | <0.0001                     | 0.006                                  | <0.0001                              |
| <b>Bone disease</b>                      | 1.14                   | 1.09  | 0.91               | 0.1               | 0.006                       | 0.006                                  | 0.054                                |
| <b>Poisoning</b>                         | 14.60                  | 14.48 | 14.38              | 5.21              | 0.002                       | <0.0001                                | 0.590                                |

<sup>a</sup> In Italy, SARS-CoV-2 infection was codified as a respiratory disease instead of an infectious disease.

Abbreviations: CNS, central nervous system; COVID-19, Coronavirus Disease-19 SARS-CoV-2, severe acute respiratory syndrome coronavirus 2

Supplementary Table S2. AKI incidence and staging during all the observational period

|                        | Year<br>(Jan-Dec) | no AKI<br>n, (%) | AKI stage 1<br>n, (%) | AKI stage 2<br>n, (%) | AKI stage 3<br>n, (%) | Total  |
|------------------------|-------------------|------------------|-----------------------|-----------------------|-----------------------|--------|
| Pre-COVID-19<br>period | 2016              | 11,270           | 2,761                 | 625                   | 282                   | 14,938 |
|                        |                   | (75.45)          | (18.48)               | (4.18)                | (1.89)                | 100.00 |
|                        | 2017              | 10,349           | 2,670                 | 596                   | 260                   | 13,875 |
|                        |                   | (74.59)          | (19.24)               | (4.30)                | (1.87)                | 100.00 |
|                        | 2018              | 7,700            | 1,948                 | 402                   | 145                   | 10,195 |
|                        |                   | (75.53)          | (19.11)               | (3.94)                | (1.42)                | 100.00 |
|                        | 2019              | 8,971            | 2,824                 | 612                   | 266                   | 12,673 |
|                        |                   | (70.79)          | (22.28)               | (4.83)                | (2.10)                | 100.00 |
| COVID-19<br>period     | 2020              | 6,871            | 2,308                 | 581                   | 302                   | 10,062 |
|                        |                   | (68.29)          | (22.94)               | (5.77)                | (3.00)                | 100.00 |
| Total                  |                   | 45,161           | 12,511                | 2,816                 | 1,255                 | 61,743 |
|                        |                   | (73.14)          | (20.26)               | (4.56)                | (2.03)                | 100.00 |

Abbreviations: AKI, acute kidney injury; COVID-19, Coronavirus Disease-19
